# Supplementary material
Source: MDPI journal article supplement (https://www.mdpi.com/2073-4395/12/4/831)
Supplement: s1 [file s1 › agronomy-1647972-Supplementary Materials.pdf]

## Supplementary Materials

**Table S1.** Applications of fertilizers and plant protection products on wheat plants.

| Application date            | Substance (dose/concentration; type)                            | Active ingredients                                                                                     |
|-----------------------------|-----------------------------------------------------------------|--------------------------------------------------------------------------------------------------------|
| 18 <sup>th</sup> April 2018 | calcium ammonium nitrate (64.3 kg ha <sup>-1</sup> ; <i>F</i> ) | 27% N (13.5% N-NO <sub>3</sub> <sup>-</sup> + 13.5% N-NH <sub>4</sub> <sup>+</sup> ), 7% CaO, 5% MgO   |
| 20 <sup>th</sup> April 2018 | Boogie <sub>xpro</sub> (0.3%; <i>FC</i> )                       | 50 g l <sup>-1</sup> bixafen, 100 g l <sup>-1</sup> prothioconazole, 250 g l <sup>-1</sup> spiroxamine |
| 23 <sup>rd</sup> April 2018 | calcium ammonium nitrate (64.3 kg ha <sup>-1</sup> ; <i>F</i> ) | 27% N (13.5% N-NO <sub>3</sub> <sup>-</sup> + 13.5% N-NH <sub>4</sub> <sup>+</sup> ), 7% CaO, 5% MgO   |
| 25 <sup>th</sup> April 2018 | NURELLE D (0.2%; <i>IC</i> )                                    | 500 g l <sup>-1</sup> chlorpyrifos, 50 g l <sup>-1</sup> cypermethrin                                  |
| 9 <sup>th</sup> May 2018    | MOSPILAN ® 20 SP (0.02%; <i>IC</i> )                            | 200 g kg <sup>-1</sup> acetamiprid                                                                     |
| 18 <sup>th</sup> May 2018   | Boogie <sub>xpro</sub> (0.3%; <i>FC</i> )                       | 50 g l <sup>-1</sup> bixafen, 100 g l <sup>-1</sup> prothioconazole, 250 g l <sup>-1</sup> spiroxamine |
| 11 <sup>th</sup> June 2018  | MOSPILAN ® 20 SP (0.02%; <i>IC</i> )                            | 200 g kg <sup>-1</sup> acetamiprid                                                                     |

*F*: fertilization, *FC*: fungicide, *IC*: insecticide.

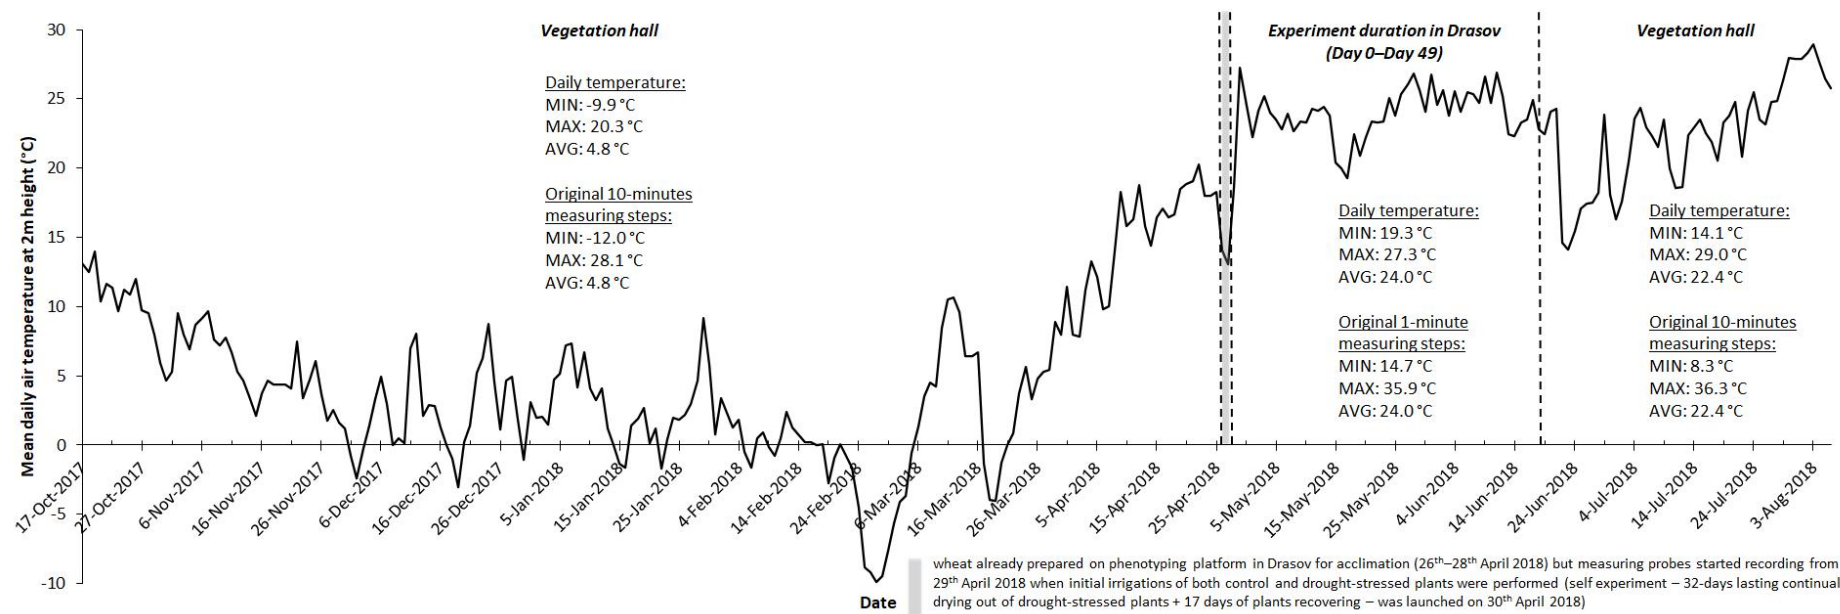

**Figure S1.** Mean daily air temperatures at a height of 2 m among the experimental plants in the vegetation hall in Brno and on the phenotyping platform of the greenhouse in Drasov. Minimal (MIN), maximal (MAX), and mean (AVG) air temperatures for (1) daily measurements (from 0:00 to 24:00) and for (2) original 10 min measurement increments (in the vegetation hall) or original 1 min measurement increments (in the greenhouse).
